# Supplementary material for: Genome-Wide Identification, Characterization, and Expression Profiling of the Legume BZR Transcription Factor Gene Family
Source: Front Plant Sci. 2018 Sep 19;9:1332. doi: 10.3389/fpls.2018.01332 (PMC6156370; doi:10.3389/fpls.2018.01332)
Supplement: TABLE S8 — Segmentally/tandemly duplicated BZR gene pairs and the gene expression clusters in which they are located. [file Table_8.XLSX]

## Sheet: Sheet1
Table S8. Segmentally/tandemly duplicated BZR gene pairs and the gene expression clusters in which they are located.
S8.1 Information of segmentally duplicated BZR genes and their expression clusters.
Species	BZR ID	Cluster ID	BZR ID	Cluster ID
G. max	GmBZR1	1	GmBZR6	2
G. max	GmBZR2	3	GmBZR3	2
G. max	GmBZR2	3	GmBZR4	3
G. max	GmBZR2	3	GmBZR5	1
G. max	GmBZR2	3	GmBZR8	3
G. max	GmBZR2	3	GmBZR13	2
G. max	GmBZR2	3	GmBZR15	2
G. max	GmBZR3	2	GmBZR4	3
G. max	GmBZR3	2	GmBZR8	3
G. max	GmBZR3	2	GmBZR13	2
G. max	GmBZR3	2	GmBZR15	2
G. max	GmBZR4	3	GmBZR5	1
G. max	GmBZR4	3	GmBZR8	3
G. max	GmBZR4	3	GmBZR13	2
G. max	GmBZR4	3	GmBZR15	2
G. max	GmBZR8	3	GmBZR13	2
G. max	GmBZR8	3	GmBZR15	2
G. max	GmBZR11	2	GmBZR13	2
G. max	GmBZR13	2	GmBZR15	2
G. max	GmBZR8	3	GmBZR9	2
G. max	GmBZR9	2	GmBZR11	2
G. max	GmBZR11	2	GmBZR14	1
P. vulgaris	PvBZR1	2	PvBZR2	3
P. vulgaris	PvBZR1	2	PvBZR5	2
P. vulgaris	PvBZR1	2	PvBZR7	2
P. vulgaris	PvBZR2	3	PvBZR7	2
M. truncatula	MtBZR4	3	MtBZR5	3
S8.2 Information of tandemly duplicated BZR genes and their expression clusters.
Species	BZR ID		BZR ID
G. max	GmBZR9	2	GmBZR10	2
G. max	GmBZR11	2	GmBZR12	2
M. truncatula	MtBZR2	1	MtBZR3	3
P. vulgaris	PvBZR2	3	PvBZR3	3
