# Supplementary material for: Genome-Wide Identification, Characterization, and Expression Profiling of the Legume BZR Transcription Factor Gene Family
Source: Front Plant Sci. 2018 Sep 19;9:1332. doi: 10.3389/fpls.2018.01332 (PMC6156370; doi:10.3389/fpls.2018.01332)
Supplement: TABLE S9 — Comparison of BZRs expression from one species to their orthologs expression from the other species (Orthologs with similar expression clusters are marked in red). [file Table_9.XLSX]

## Sheet: Sheet1
Table S9. Comparison of BZRs expression from one species to their orthologs expression from the other species (Orthologs with similar expression clusters are marked in red)
Species pair	OrtoA	Cluster ID	OrtoB	Cluster ID
	MtBZR3	3	GmBZR9	2
	MtBZR3	3	GmBZR10	2
	MtBZR3	3	GmBZR11	2
	MtBZR3	3	GmBZR12	2
	MtBZR2	1	GmBZR9	2
	MtBZR2	1	GmBZR10	2
M. truncatula	MtBZR2	1	GmBZR11	2
vs	MtBZR2	1	GmBZR12	2
G. max	MtBZR5	3	GmBZR2	3
	MtBZR5	3	GmBZR8	3
	MtBZR5	3	GmBZR5	1
	MtBZR4	3	GmBZR15	2
	MtBZR4	3	GmBZR4	3
	MtBZR4	3	GmBZR13	2
	MtBZR4	3	GmBZR3	2
	MtBZR7	1	GmBZR16	2
	MtBZR6	2	GmBZR6	2
	MtBZR6	2	GmBZR1	1
	MtBZR3	3	PvBZR5	2
	MtBZR2	1	PvBZR5	2
M. truncatula	MtBZR5	3	PvBZR2	3
vs	MtBZR5	3	PvBZR3	3
P. vulgaris	MtBZR4	3	PvBZR1	2
	MtBZR4	3	PvBZR7	2
	MtBZR7	1	PvBZR6	1
	MtBZR6	2	PvBZR4	1
M. truncatula	MtBZR3	3	LjBZR1	2
vs	MtBZR2	1	LjBZR1	2
L. japonicus	MtBZR6	2	LjBZR3	3
	MtBZR4	3	LjBZR5	3
	GmBZR9	2	PvBZR5	2
	GmBZR10	2	PvBZR5	2
	GmBZR11	2	PvBZR5	2
	GmBZR12	2	PvBZR5	2
	GmBZR8	3	PvBZR2	3
	GmBZR8	3	PvBZR3	3
	GmBZR2	3	PvBZR2	3
	GmBZR2	3	PvBZR3	3
	GmBZR5	1	PvBZR2	3
G. max	GmBZR5	1	PvBZR3	3
vs	GmBZR3	2	PvBZR1	2
P. vulgaris	GmBZR3	2	PvBZR7	2
	GmBZR15	2	PvBZR1	2
	GmBZR15	2	PvBZR7	2
	GmBZR13	2	PvBZR1	2
	GmBZR13	2	PvBZR7	2
	GmBZR4	3	PvBZR1	2
	GmBZR4	3	PvBZR7	2
	GmBZR16	2	PvBZR6	1
	GmBZR6	2	PvBZR4	1
	GmBZR1	1	PvBZR4	1
	GmBZR9	2	LjBZR1	2
	GmBZR10	2	LjBZR1	2
	GmBZR11	2	LjBZR1	2
G. max	GmBZR12	2	LjBZR1	2
vs	GmBZR6	2	LjBZR3	3
L. japonicus	GmBZR1	1	LjBZR3	3
	GmBZR15	2	LjBZR5	3
	GmBZR4	3	LjBZR5	3
	GmBZR13	2	LjBZR5	3
	GmBZR3	2	LjBZR5	3
P. vulgaris	PvBZR1	2	LjBZR5	3
vs	PvBZR7	2	LjBZR5	3
L. japonicus	PvBZR4	1	LjBZR3	3
	PvBZR5	2	LjBZR1	2
